# Supplementary material for: Provocation and prediction of visual peripersonal neglect-like symptoms in preoperative planning and during awake brain surgery
Source: Springer Nature journal article supplement (doi:10.1007/s00701-021-04822-2), 2021-04-05
Supplement: MOESM1 [file 19035964]

**Provocation and prediction of visual peripersonal neglect-like symptoms in preoperative planning and during awake surgery**

Viktória Tamás<sup>1</sup>

Gabriella Sebestyén<sup>1</sup>

Szilvia Anett Nagy<sup>2,3,4,5</sup>

Péter Zsolt Horváth<sup>1</sup>

Ákos Mérei<sup>6</sup>

Francesco Tomaiuolo<sup>7</sup>

Giovanni Raffa<sup>8</sup>

Antonino Francesco Germanó<sup>8</sup>

András Büki<sup>1,9</sup>

<sup>1</sup>Department of Neurosurgery, Medical School, University of Pécs, Hungary,

<sup>2</sup>MTA-PTE Clinical Neuroscience MR Research Group, Pécs, Hungary, Hungary

<sup>3</sup>János Szentágothai Research Centre, University of Pécs, Hungary

<sup>4</sup>Pécs Diagnostic Center, Hungary

<sup>5</sup>Department of Laboratory Medicine, Medical School, University of Pécs, Hungary

<sup>6</sup>Department of Anesthesiology and Intensive Therapy, Medical School, University of Pécs, Hungary

<sup>7</sup>Department of Clinical and Experimental Medicine, University of Messina, Italy

<sup>8</sup>Department of Biomedical, Dental, Morphological and Functional Imaging Sciences, University of Messina, Italy

<sup>9</sup>Neurotrauma Research Group, Szentágothai Research Centre, University of Pécs, Hungary

Corresponding Author: Viktória Tamás, [tamas.viktoria@pte.hu](mailto:tamas.viktoria@pte.hu), +36305594559

*Supplementary Material 1. Tests for neuropsychological/psychological evaluation*

- Rey Auditory Verbal Learning Test (RAVLT) – verbal learning and episodic memory
- Phonemic and semantic Verbal Fluency Tests - executive functions and semantic retrieval/retrograde memory
- Rey Osterrieth Complex Figure Test (ROCF) visual attention, incidental memory, executive functions
- Part A and B of the Trail Making Test (TMT A and B) - psychomotor speed, visuospatial skills, mental flexibility, attention switching
- Frontal Assessment Battery (FAB) - executive functions, inhibitory control
- Digit Span Forward and Backward - short-term memory/attention and working memory)
- Pieron Test – attention, concentration
- Clock-Drawing Test - visuospatial abilities, executive functions
- Picture naming part of the Dean Woodcock Neuropsychological Battery (DWNB) – language, gnosis
- Finger Tapping and Grip Strength Assessment of Dean Woodcock Neuropsychological Battery (DWNB) – motor functions/skills
- Pattern fluency test (Five-Point Test) – executive functions, visual attention
- Shortened Beck Depression Inventory (13 items), Beck Anxiety Inventory, SF-12 Questionnaire and the MD Anderson Symptom Inventory - assessment of intrapsychic and health state
- Line Bisection Test – visuospatial attention, vision
- Bells test – visuospatial attention, vision
